# Supplementary material for: The most bothersome symptoms in neuromuscular diseases: the ERN EURO NMD Survey
Source: Springer Nature journal article supplement (doi:10.1186/s13023-025-03742-z), 2025-05-08
Supplement: MOESM1 [file 13023_2025_3742_MOESM1_ESM.pdf]

**SUPPLEMENTARY TABLE 1: Weighted severity scores of symptoms investigated by the EURO-PRO Questionnaire within each neuromuscular disease group**

| <b>Disease</b>                                                                | <b>Symptom</b>                            | <b>Weighted symptoms severity scores</b> |
|-------------------------------------------------------------------------------|-------------------------------------------|------------------------------------------|
| Amyotrophic Lateral Sclerosis and other motor neuron diseases (excluding SMA) | Muscle Weakness                           | 2.30                                     |
|                                                                               | Impaired physical function/activity       | 2.30                                     |
|                                                                               | Coordination and/or balance problems      | 2.10                                     |
|                                                                               | Muscular Fatigue                          | 1.70                                     |
|                                                                               | Involuntary muscle contractions           | 1.70                                     |
|                                                                               | Muscle Stiffness                          | 1.50                                     |
|                                                                               | Speech problems                           | 1.30                                     |
|                                                                               | Muscle Pain                               | 1.20                                     |
|                                                                               | Mental Fatigue                            | 1.10                                     |
|                                                                               | Sexual dysfunction                        | 1.10                                     |
|                                                                               | Joint pain and/or swollen joints          | 0.80                                     |
|                                                                               | Neuropathic pain                          | 0.80                                     |
|                                                                               | Chewing and Swallowing difficulties       | 0.70                                     |
|                                                                               | Sleep disturbance                         | 0.70                                     |
|                                                                               | Gastrointestinal dysfunction              | 0.70                                     |
|                                                                               | Urinary dysfunctions                      | 0.70                                     |
|                                                                               | Breathing difficulties                    | 0.60                                     |
|                                                                               | Mental health issues                      | 0.60                                     |
|                                                                               | Behavioural impairment                    | 0.60                                     |
|                                                                               | Symptoms suggestive of cardiac impairment | 0.50                                     |
|                                                                               | Tingling                                  | 0.50                                     |
|                                                                               | Headache                                  | 0.40                                     |
|                                                                               | Cognitive impairment                      | 0.40                                     |
|                                                                               | Autonomic symptoms                        | 0.40                                     |
|                                                                               | Sensory loss, hyperesthesia or allodynia  | 0.30                                     |
|                                                                               | Dizziness                                 | 0.20                                     |
|                                                                               | Vision impairment                         | 0.00                                     |
|                                                                               | Hearing impairment                        | 0.00                                     |
| Charcot-Marie-Tooth disease and related neuropathies (HNNP, HSAN, dHMN)       | Coordination and/or balance problems      | 2.29                                     |
|                                                                               | Muscle Weakness                           | 2.11                                     |
|                                                                               | Impaired physical function/activity       | 2.01                                     |
|                                                                               | Muscular Fatigue                          | 1.95                                     |
|                                                                               | Muscle Stiffness                          | 1.58                                     |
|                                                                               | Tingling                                  | 1.44                                     |
|                                                                               | Muscle Pain                               | 1.38                                     |
|                                                                               | Neuropathic pain                          | 1.38                                     |
|                                                                               | Mental Fatigue                            | 1.37                                     |
|                                                                               | Joint pain and/or swollen joints          | 1.32                                     |
|                                                                               | Sensory loss, hyperesthesia or allodynia  | 1.29                                     |
|                                                                               | Involuntary muscle contractions           | 1.18                                     |
|                                                                               | Sleep disturbance                         | 1.14                                     |

**SUPPLEMENTARY TABLE 1: Weighted severity scores of symptoms investigated by the EURO-PRO Questionnaire within each neuromuscular disease group**

| <b>Disease</b>                  | <b>Symptom</b>                            | <b>Weighted symptoms severity scores</b> |
|---------------------------------|-------------------------------------------|------------------------------------------|
| Congenital Myasthenic Syndromes | Mental health issues                      | 0.86                                     |
|                                 | Sexual dysfunction                        | 0.80                                     |
|                                 | Hearing impairment                        | 0.79                                     |
|                                 | Gastrointestinal dysfunction              | 0.74                                     |
|                                 | Symptoms suggestive of cardiac impairment | 0.62                                     |
|                                 | Urinary dysfunctions                      | 0.61                                     |
|                                 | Autonomic symptoms                        | 0.59                                     |
|                                 | Cognitive impairment                      | 0.56                                     |
|                                 | Vision impairment                         | 0.52                                     |
|                                 | Dizziness                                 | 0.46                                     |
|                                 | Headache                                  | 0.44                                     |
|                                 | Breathing difficulties                    | 0.38                                     |
|                                 | Chewing and Swallowing difficulties       | 0.33                                     |
|                                 | Behavioural impairment                    | 0.33                                     |
|                                 | Speech problems                           | 0.19                                     |
|                                 | Impaired physical function/activity       | 1.86                                     |
|                                 | Muscle Weakness                           | 1.71                                     |
|                                 | Muscular Fatigue                          | 1.64                                     |
|                                 | Vision impairment                         | 1.50                                     |
|                                 | Muscle Stiffness                          | 0.86                                     |
|                                 | Joint pain and/or swollen joints          | 0.86                                     |
|                                 | Chewing and Swallowing difficulties       | 0.86                                     |
|                                 | Mental Fatigue                            | 0.64                                     |
|                                 | Muscle Pain                               | 0.64                                     |
|                                 | Symptoms suggestive of cardiac impairment | 0.64                                     |
|                                 | Involuntary muscle contractions           | 0.64                                     |
|                                 | Sleep disturbance                         | 0.64                                     |
|                                 | Gastrointestinal dysfunction              | 0.64                                     |
|                                 | Mental health issues                      | 0.57                                     |
|                                 | Tingling                                  | 0.57                                     |
|                                 | Breathing difficulties                    | 0.50                                     |
|                                 | Headache                                  | 0.50                                     |
|                                 | Hearing impairment                        | 0.36                                     |
|                                 | Speech problems                           | 0.36                                     |
|                                 | Autonomic symptoms                        | 0.36                                     |
|                                 | Coordination and/or balance problems      | 0.29                                     |
|                                 | Urinary dysfunctions                      | 0.21                                     |
|                                 | Neuropathic pain                          | 0.14                                     |
|                                 | Cognitive impairment                      | 0.14                                     |
|                                 | Behavioural impairment                    | 0.14                                     |
|                                 | Sexual dysfunction                        | 0.14                                     |

**SUPPLEMENTARY TABLE 1: Weighted severity scores of symptoms investigated by the EURO-PRO Questionnaire within each neuromuscular disease group**

| <b>Disease</b>                                            | <b>Symptom</b>                            | <b>Weighted symptoms severity scores</b> |
|-----------------------------------------------------------|-------------------------------------------|------------------------------------------|
| Congenital Myopathies and Congenital muscular dystrophies | Dizziness                                 | 0.07                                     |
|                                                           | Sensory loss, hyperesthesia or allodynia  | 0.07                                     |
|                                                           | Impaired physical function/activity       | 1.82                                     |
|                                                           | Muscular Fatigue                          | 1.73                                     |
|                                                           | Muscle Weakness                           | 1.59                                     |
|                                                           | Muscle Stiffness                          | 1.27                                     |
|                                                           | Coordination and/or balance problems      | 1.27                                     |
|                                                           | Sleep disturbance                         | 1.09                                     |
|                                                           | Mental Fatigue                            | 0.95                                     |
|                                                           | Gastrointestinal dysfunction              | 0.95                                     |
|                                                           | Muscle Pain                               | 0.86                                     |
|                                                           | Joint pain and/or swollen joints          | 0.86                                     |
|                                                           | Involuntary muscle contractions           | 0.77                                     |
|                                                           | Symptoms suggestive of cardiac impairment | 0.73                                     |
|                                                           | Autonomic symptoms                        | 0.73                                     |
|                                                           | Vision impairment                         | 0.64                                     |
|                                                           | Chewing and Swallowing difficulties       | 0.59                                     |
|                                                           | Breathing difficulties                    | 0.59                                     |
|                                                           | Cognitive impairment                      | 0.59                                     |
|                                                           | Tingling                                  | 0.59                                     |
|                                                           | Headache                                  | 0.55                                     |
|                                                           | Mental health issues                      | 0.55                                     |
|                                                           | Neuropathic pain                          | 0.50                                     |
|                                                           | Behavioural impairment                    | 0.45                                     |
|                                                           | Hearing impairment                        | 0.41                                     |
|                                                           | Urinary dysfunctions                      | 0.41                                     |
|                                                           | Sexual dysfunction                        | 0.36                                     |
|                                                           | Sensory loss, hyperesthesia or allodynia  | 0.32                                     |
|                                                           | Speech problems                           | 0.18                                     |
|                                                           | Dizziness                                 | 0.18                                     |
| Duchenne or Becker Muscular Dystrophy                     | Impaired physical function/activity       | 2.29                                     |
|                                                           | Muscle Weakness                           | 2.27                                     |
|                                                           | Muscular Fatigue                          | 1.75                                     |
|                                                           | Coordination and/or balance problems      | 1.62                                     |
|                                                           | Muscle Stiffness                          | 1.33                                     |
|                                                           | Muscle Pain                               | 1.19                                     |
|                                                           | Mental Fatigue                            | 1.12                                     |
|                                                           | Symptoms suggestive of cardiac impairment | 1.02                                     |
|                                                           | Breathing difficulties                    | 1.02                                     |
|                                                           | Joint pain and/or swollen joints          | 0.96                                     |
|                                                           | Chewing and Swallowing difficulties       | 0.83                                     |

**SUPPLEMENTARY TABLE 1: Weighted severity scores of symptoms investigated by the EURO-PRO Questionnaire within each neuromuscular disease group**

| <b>Disease</b>                                | <b>Symptom</b>                            | <b>Weighted symptoms severity scores</b> |
|-----------------------------------------------|-------------------------------------------|------------------------------------------|
| Facioscapulohumeral Muscular Dystrophy (FSHD) | Sleep disturbance                         | 0.83                                     |
|                                               | Involuntary muscle contractions           | 0.79                                     |
|                                               | Gastrointestinal dysfunction              | 0.77                                     |
|                                               | Neuropathic pain                          | 0.56                                     |
|                                               | Autonomic symptoms                        | 0.56                                     |
|                                               | Vision impairment                         | 0.54                                     |
|                                               | Mental health issues                      | 0.54                                     |
|                                               | Tingling                                  | 0.54                                     |
|                                               | Speech problems                           | 0.52                                     |
|                                               | Headache                                  | 0.48                                     |
|                                               | Behavioural impairment                    | 0.46                                     |
|                                               | Cognitive impairment                      | 0.42                                     |
|                                               | Sexual dysfunction                        | 0.42                                     |
|                                               | Dizziness                                 | 0.27                                     |
|                                               | Sensory loss, hyperesthesia or allodynia  | 0.25                                     |
|                                               | Urinary dysfunctions                      | 0.23                                     |
|                                               | Hearing impairment                        | 0.10                                     |
|                                               | Muscle Weakness                           | 2.21                                     |
|                                               | Impaired physical function/activity       | 2.13                                     |
|                                               | Muscular Fatigue                          | 1.97                                     |
|                                               | Coordination and/or balance problems      | 1.82                                     |
|                                               | Muscle Stiffness                          | 1.63                                     |
|                                               | Muscle Pain                               | 1.55                                     |
|                                               | Mental Fatigue                            | 1.34                                     |
|                                               | Joint pain and/or swollen joints          | 1.34                                     |
|                                               | Involuntary muscle contractions           | 1.02                                     |
|                                               | Sleep disturbance                         | 0.90                                     |
|                                               | Neuropathic pain                          | 0.89                                     |
|                                               | Mental health issues                      | 0.87                                     |
|                                               | Gastrointestinal dysfunction              | 0.79                                     |
|                                               | Headache                                  | 0.71                                     |
|                                               | Sexual dysfunction                        | 0.71                                     |
|                                               | Tingling                                  | 0.69                                     |
|                                               | Symptoms suggestive of cardiac impairment | 0.68                                     |
|                                               | Cognitive impairment                      | 0.63                                     |
|                                               | Autonomic symptoms                        | 0.61                                     |
|                                               | Vision impairment                         | 0.60                                     |
|                                               | Breathing difficulties                    | 0.58                                     |
|                                               | Hearing impairment                        | 0.53                                     |
|                                               | Behavioural impairment                    | 0.47                                     |
|                                               | Chewing and Swallowing difficulties       | 0.44                                     |

**SUPPLEMENTARY TABLE 1: Weighted severity scores of symptoms investigated by the EURO-PRO Questionnaire within each neuromuscular disease group**

| <b>Disease</b>                       | <b>Symptom</b>                            | <b>Weighted symptoms severity scores</b> |
|--------------------------------------|-------------------------------------------|------------------------------------------|
| I do not know the name of my disease | Urinary dysfunctions                      | 0.44                                     |
|                                      | Dizziness                                 | 0.42                                     |
|                                      | Sensory loss, hyperesthesia or allodynia  | 0.23                                     |
|                                      | Speech problems                           | 0.21                                     |
|                                      | Muscular Fatigue                          | 2.00                                     |
|                                      | Muscle Weakness                           | 1.88                                     |
|                                      | Impaired physical function/activity       | 1.88                                     |
|                                      | Coordination and/or balance problems      | 1.75                                     |
|                                      | Muscle Stiffness                          | 1.62                                     |
|                                      | Involuntary muscle contractions           | 1.62                                     |
|                                      | Muscle Pain                               | 1.50                                     |
|                                      | Vision impairment                         | 1.50                                     |
|                                      | Gastrointestinal dysfunction              | 1.50                                     |
|                                      | Mental health issues                      | 1.25                                     |
|                                      | Behavioural impairment                    | 1.25                                     |
|                                      | Tingling                                  | 1.25                                     |
|                                      | Urinary dysfunctions                      | 1.25                                     |
|                                      | Mental Fatigue                            | 1.12                                     |
|                                      | Neuropathic pain                          | 1.12                                     |
|                                      | Headache                                  | 1.12                                     |
|                                      | Cognitive impairment                      | 1.12                                     |
|                                      | Sleep disturbance                         | 1.12                                     |
|                                      | Hearing impairment                        | 1.00                                     |
|                                      | Dizziness                                 | 1.00                                     |
|                                      | Autonomic symptoms                        | 1.00                                     |
|                                      | Joint pain and/or swollen joints          | 0.88                                     |
|                                      | Symptoms suggestive of cardiac impairment | 0.88                                     |
|                                      | Chewing and Swallowing difficulties       | 0.88                                     |
|                                      | Sexual dysfunction                        | 0.88                                     |
|                                      | Sensory loss, hyperesthesia or allodynia  | 0.88                                     |
|                                      | Breathing difficulties                    | 0.75                                     |
|                                      | Speech problems                           | 0.62                                     |
| Idiopathic Inflammatory Myopathies   | Muscular Fatigue                          | 2.00                                     |
|                                      | Muscle Weakness                           | 1.97                                     |
|                                      | Impaired physical function/activity       | 1.90                                     |
|                                      | Coordination and/or balance problems      | 1.48                                     |
|                                      | Muscle Stiffness                          | 1.39                                     |
|                                      | Mental Fatigue                            | 1.35                                     |
|                                      | Sleep disturbance                         | 1.32                                     |
|                                      | Muscle Pain                               | 1.29                                     |
|                                      | Neuropathic pain                          | 1.23                                     |

**SUPPLEMENTARY TABLE 1: Weighted severity scores of symptoms investigated by the EURO-PRO Questionnaire within each neuromuscular disease group**

| <b>Disease</b>          | <b>Symptom</b>                            | <b>Weighted symptoms severity scores</b> |
|-------------------------|-------------------------------------------|------------------------------------------|
| Idiopathic Neuropathies | Sexual dysfunction                        | 1.16                                     |
|                         | Joint pain and/or swollen joints          | 1.00                                     |
|                         | Chewing and Swallowing difficulties       | 1.00                                     |
|                         | Involuntary muscle contractions           | 0.97                                     |
|                         | Gastrointestinal dysfunction              | 0.94                                     |
|                         | Autonomic symptoms                        | 0.94                                     |
|                         | Mental health issues                      | 0.87                                     |
|                         | Cognitive impairment                      | 0.81                                     |
|                         | Sensory loss, hyperesthesia or allodynia  | 0.81                                     |
|                         | Symptoms suggestive of cardiac impairment | 0.74                                     |
|                         | Tingling                                  | 0.71                                     |
|                         | Urinary dysfunctions                      | 0.65                                     |
|                         | Behavioural impairment                    | 0.55                                     |
|                         | Headache                                  | 0.52                                     |
|                         | Breathing difficulties                    | 0.48                                     |
|                         | Hearing impairment                        | 0.45                                     |
|                         | Vision impairment                         | 0.39                                     |
|                         | Dizziness                                 | 0.35                                     |
|                         | Speech problems                           | 0.32                                     |
|                         | Tingling                                  | 2.10                                     |
|                         | Muscular Fatigue                          | 2.00                                     |
|                         | Muscle Weakness                           | 2.00                                     |
|                         | Muscle Stiffness                          | 1.80                                     |
|                         | Neuropathic pain                          | 1.80                                     |
|                         | Muscle Pain                               | 1.70                                     |
|                         | Mental Fatigue                            | 1.60                                     |
|                         | Coordination and/or balance problems      | 1.60                                     |
|                         | Sleep disturbance                         | 1.60                                     |
|                         | Cognitive impairment                      | 1.50                                     |
|                         | Sensory loss, hyperesthesia or allodynia  | 1.20                                     |
|                         | Impaired physical function/activity       | 1.10                                     |
|                         | Joint pain and/or swollen joints          | 1.10                                     |
|                         | Sexual dysfunction                        | 1.00                                     |
|                         | Gastrointestinal dysfunction              | 1.00                                     |
|                         | Mental health issues                      | 0.80                                     |
|                         | Behavioural impairment                    | 0.80                                     |
|                         | Urinary dysfunctions                      | 0.80                                     |
|                         | Autonomic symptoms                        | 0.80                                     |
|                         | Involuntary muscle contractions           | 0.70                                     |
|                         | Symptoms suggestive of cardiac impairment | 0.50                                     |
|                         | Hearing impairment                        | 0.50                                     |

**SUPPLEMENTARY TABLE 1: Weighted severity scores of symptoms investigated by the EURO-PRO Questionnaire within each neuromuscular disease group**

| <b>Disease</b>                          | <b>Symptom</b>                            | <b>Weighted symptoms severity scores</b> |
|-----------------------------------------|-------------------------------------------|------------------------------------------|
| Inflammatory and Dysimmune Neuropathies | Dizziness                                 | 0.50                                     |
|                                         | Vision impairment                         | 0.40                                     |
|                                         | Chewing and Swallowing difficulties       | 0.20                                     |
|                                         | Speech problems                           | 0.20                                     |
|                                         | Breathing difficulties                    | 0.10                                     |
|                                         | Headache                                  | 0.10                                     |
|                                         | Muscular Fatigue                          | 2.43                                     |
|                                         | Impaired physical function/activity       | 2.14                                     |
|                                         | Muscle Weakness                           | 2.00                                     |
|                                         | Muscle Stiffness                          | 1.79                                     |
|                                         | Tingling                                  | 1.79                                     |
|                                         | Coordination and/or balance problems      | 1.71                                     |
|                                         | Mental Fatigue                            | 1.64                                     |
|                                         | Muscle Pain                               | 1.64                                     |
|                                         | Involuntary muscle contractions           | 1.50                                     |
|                                         | Neuropathic pain                          | 1.50                                     |
|                                         | Gastrointestinal dysfunction              | 1.43                                     |
|                                         | Sensory loss, hyperesthesia or allodynia  | 1.43                                     |
|                                         | Sleep disturbance                         | 1.36                                     |
|                                         | Joint pain and/or swollen joints          | 1.00                                     |
|                                         | Headache                                  | 1.00                                     |
|                                         | Sexual dysfunction                        | 1.00                                     |
|                                         | Urinary dysfunctions                      | 0.86                                     |
|                                         | Vision impairment                         | 0.79                                     |
|                                         | Mental health issues                      | 0.79                                     |
|                                         | Autonomic symptoms                        | 0.79                                     |
|                                         | Hearing impairment                        | 0.71                                     |
|                                         | Cognitive impairment                      | 0.71                                     |
|                                         | Dizziness                                 | 0.71                                     |
|                                         | Chewing and Swallowing difficulties       | 0.64                                     |
|                                         | Symptoms suggestive of cardiac impairment | 0.57                                     |
|                                         | Behavioural impairment                    | 0.50                                     |
|                                         | Breathing difficulties                    | 0.21                                     |
|                                         | Speech problems                           | 0.14                                     |
| Metabolic Myopathies                    | Muscular Fatigue                          | 2.12                                     |
|                                         | Muscle Weakness                           | 2.06                                     |
|                                         | Impaired physical function/activity       | 1.88                                     |
|                                         | Muscle Pain                               | 1.65                                     |
|                                         | Muscle Stiffness                          | 1.41                                     |
|                                         | Mental Fatigue                            | 1.35                                     |
|                                         | Joint pain and/or swollen joints          | 1.35                                     |

**SUPPLEMENTARY TABLE 1: Weighted severity scores of symptoms investigated by the EURO-PRO Questionnaire within each neuromuscular disease group**

| <b>Disease</b>         | <b>Symptom</b>                            | <b>Weighted symptoms severity scores</b> |
|------------------------|-------------------------------------------|------------------------------------------|
| Mitochondrial Diseases | Coordination and/or balance problems      | 1.29                                     |
|                        | Gastrointestinal dysfunction              | 1.12                                     |
|                        | Involuntary muscle contractions           | 0.88                                     |
|                        | Sexual dysfunction                        | 0.88                                     |
|                        | Breathing difficulties                    | 0.82                                     |
|                        | Sleep disturbance                         | 0.76                                     |
|                        | Symptoms suggestive of cardiac impairment | 0.71                                     |
|                        | Urinary dysfunctions                      | 0.65                                     |
|                        | Autonomic symptoms                        | 0.65                                     |
|                        | Neuropathic pain                          | 0.59                                     |
|                        | Hearing impairment                        | 0.59                                     |
|                        | Chewing and Swallowing difficulties       | 0.53                                     |
|                        | Tingling                                  | 0.53                                     |
|                        | Headache                                  | 0.47                                     |
|                        | Mental health issues                      | 0.47                                     |
|                        | Dizziness                                 | 0.47                                     |
|                        | Speech problems                           | 0.35                                     |
|                        | Cognitive impairment                      | 0.35                                     |
|                        | Behavioural impairment                    | 0.35                                     |
|                        | Vision impairment                         | 0.29                                     |
|                        | Sensory loss, hyperesthesia or allodynia  | 0.24                                     |
|                        | Muscular Fatigue                          | 2.18                                     |
|                        | Muscle Weakness                           | 1.96                                     |
|                        | Impaired physical function/activity       | 1.94                                     |
|                        | Coordination and/or balance problems      | 1.73                                     |
|                        | Mental Fatigue                            | 1.67                                     |
|                        | Vision impairment                         | 1.62                                     |
|                        | Muscle Stiffness                          | 1.60                                     |
|                        | Muscle Pain                               | 1.50                                     |
|                        | Sleep disturbance                         | 1.43                                     |
|                        | Gastrointestinal dysfunction              | 1.40                                     |
|                        | Involuntary muscle contractions           | 1.22                                     |
|                        | Mental health issues                      | 1.09                                     |
|                        | Joint pain and/or swollen joints          | 1.06                                     |
|                        | Hearing impairment                        | 1.06                                     |
|                        | Headache                                  | 1.06                                     |
|                        | Neuropathic pain                          | 1.05                                     |
|                        | Sexual dysfunction                        | 1.03                                     |
|                        | Cognitive impairment                      | 1.01                                     |
|                        | Symptoms suggestive of cardiac impairment | 0.95                                     |
|                        | Tingling                                  | 0.94                                     |



**SUPPLEMENTARY TABLE 1: Weighted severity scores of symptoms investigated by the EURO-PRO Questionnaire within each neuromuscular disease group**

| <b>Disease</b>          | <b>Symptom</b>                            | <b>Weighted symptoms severity scores</b> |
|-------------------------|-------------------------------------------|------------------------------------------|
| Myasthenia gravis       | Autonomic symptoms                        | 0.94                                     |
|                         | Chewing and Swallowing difficulties       | 0.92                                     |
|                         | Dizziness                                 | 0.83                                     |
|                         | Speech problems                           | 0.81                                     |
|                         | Urinary dysfunctions                      | 0.79                                     |
|                         | Sensory loss, hyperesthesia or allodynia  | 0.78                                     |
|                         | Behavioural impairment                    | 0.71                                     |
|                         | Breathing difficulties                    | 0.67                                     |
|                         | Muscular Fatigue                          | 2.00                                     |
|                         | Muscle Weakness                           | 1.90                                     |
|                         | Vision impairment                         | 1.63                                     |
|                         | Mental Fatigue                            | 1.61                                     |
|                         | Impaired physical function/activity       | 1.56                                     |
|                         | Muscle Pain                               | 1.32                                     |
|                         | Muscle Stiffness                          | 1.29                                     |
|                         | Involuntary muscle contractions           | 1.27                                     |
|                         | Gastrointestinal dysfunction              | 1.24                                     |
|                         | Mental health issues                      | 1.20                                     |
|                         | Sleep disturbance                         | 1.17                                     |
|                         | Cognitive impairment                      | 1.10                                     |
|                         | Coordination and/or balance problems      | 1.02                                     |
|                         | Autonomic symptoms                        | 1.02                                     |
|                         | Headache                                  | 1.00                                     |
|                         | Chewing and Swallowing difficulties       | 0.95                                     |
|                         | Sexual dysfunction                        | 0.90                                     |
|                         | Symptoms suggestive of cardiac impairment | 0.88                                     |
|                         | Joint pain and/or swollen joints          | 0.85                                     |
|                         | Urinary dysfunctions                      | 0.85                                     |
|                         | Breathing difficulties                    | 0.76                                     |
|                         | Speech problems                           | 0.76                                     |
|                         | Behavioural impairment                    | 0.76                                     |
|                         | Dizziness                                 | 0.73                                     |
|                         | Tingling                                  | 0.68                                     |
|                         | Neuropathic pain                          | 0.61                                     |
|                         | Hearing impairment                        | 0.61                                     |
|                         | Sensory loss, hyperesthesia or allodynia  | 0.44                                     |
| Myofibrillar Myopathies | Muscle Weakness                           | 2.50                                     |
|                         | Muscular Fatigue                          | 2.33                                     |
|                         | Impaired physical function/activity       | 2.33                                     |
|                         | Coordination and/or balance problems      | 2.00                                     |
|                         | Muscle Stiffness                          | 1.83                                     |

**SUPPLEMENTARY TABLE 1: Weighted severity scores of symptoms investigated by the EURO-PRO Questionnaire within each neuromuscular disease group**

| <b>Disease</b>       | <b>Symptom</b>                            | <b>Weighted symptoms severity scores</b> |
|----------------------|-------------------------------------------|------------------------------------------|
| Myotonic Dystrophies | Mental Fatigue                            | 1.50                                     |
|                      | Muscle Pain                               | 1.50                                     |
|                      | Joint pain and/or swollen joints          | 1.50                                     |
|                      | Symptoms suggestive of cardiac impairment | 1.33                                     |
|                      | Neuropathic pain                          | 1.33                                     |
|                      | Chewing and Swallowing difficulties       | 1.33                                     |
|                      | Involuntary muscle contractions           | 1.00                                     |
|                      | Sexual dysfunction                        | 1.00                                     |
|                      | Gastrointestinal dysfunction              | 1.00                                     |
|                      | Speech problems                           | 0.83                                     |
|                      | Sleep disturbance                         | 0.83                                     |
|                      | Sensory loss, hyperesthesia or allodynia  | 0.83                                     |
|                      | Breathing difficulties                    | 0.67                                     |
|                      | Mental health issues                      | 0.67                                     |
|                      | Behavioural impairment                    | 0.67                                     |
|                      | Dizziness                                 | 0.67                                     |
|                      | Urinary dysfunctions                      | 0.67                                     |
|                      | Autonomic symptoms                        | 0.67                                     |
|                      | Vision impairment                         | 0.50                                     |
|                      | Cognitive impairment                      | 0.50                                     |
|                      | Tingling                                  | 0.50                                     |
|                      | Hearing impairment                        | 0.33                                     |
|                      | Headache                                  | 0.17                                     |
|                      | Muscle Weakness                           | 2.22                                     |
|                      | Muscular Fatigue                          | 2.15                                     |
|                      | Coordination and/or balance problems      | 1.96                                     |
|                      | Impaired physical function/activity       | 1.78                                     |
|                      | Muscle Stiffness                          | 1.65                                     |
|                      | Gastrointestinal dysfunction              | 1.59                                     |
|                      | Mental Fatigue                            | 1.52                                     |
|                      | Sleep disturbance                         | 1.52                                     |
|                      | Vision impairment                         | 1.41                                     |
|                      | Involuntary muscle contractions           | 1.35                                     |
|                      | Muscle Pain                               | 1.24                                     |
|                      | Joint pain and/or swollen joints          | 1.20                                     |
|                      | Speech problems                           | 1.15                                     |
|                      | Breathing difficulties                    | 1.11                                     |
|                      | Chewing and Swallowing difficulties       | 1.09                                     |
|                      | Urinary dysfunctions                      | 1.02                                     |
|                      | Sexual dysfunction                        | 0.93                                     |
|                      | Symptoms suggestive of cardiac impairment | 0.91                                     |

**SUPPLEMENTARY TABLE 1: Weighted severity scores of symptoms investigated by the EURO-PRO Questionnaire within each neuromuscular disease group**

| <b>Disease</b>                                                                                   | <b>Symptom</b>                            | <b>Weighted symptoms severity scores</b> |
|--------------------------------------------------------------------------------------------------|-------------------------------------------|------------------------------------------|
| Neuropathies associated with haematological disease and monoclonal gammopathy (MGUS, POEMS, ETC) | Cognitive impairment                      | 0.87                                     |
|                                                                                                  | Mental health issues                      | 0.83                                     |
|                                                                                                  | Autonomic symptoms                        | 0.80                                     |
|                                                                                                  | Tingling                                  | 0.74                                     |
|                                                                                                  | Behavioural impairment                    | 0.70                                     |
|                                                                                                  | Headache                                  | 0.67                                     |
|                                                                                                  | Dizziness                                 | 0.63                                     |
|                                                                                                  | Neuropathic pain                          | 0.59                                     |
|                                                                                                  | Hearing impairment                        | 0.46                                     |
|                                                                                                  | Sensory loss, hyperesthesia or allodynia  | 0.39                                     |
|                                                                                                  | Joint pain and/or swollen joints          | 2.25                                     |
|                                                                                                  | Autonomic symptoms                        | 2.25                                     |
|                                                                                                  | Muscular Fatigue                          | 2.00                                     |
|                                                                                                  | Mental Fatigue                            | 2.00                                     |
|                                                                                                  | Muscle Weakness                           | 2.00                                     |
|                                                                                                  | Muscle Pain                               | 2.00                                     |
|                                                                                                  | Neuropathic pain                          | 2.00                                     |
|                                                                                                  | Muscle Stiffness                          | 1.75                                     |
|                                                                                                  | Coordination and/or balance problems      | 1.75                                     |
|                                                                                                  | Gastrointestinal dysfunction              | 1.75                                     |
|                                                                                                  | Impaired physical function/activity       | 1.50                                     |
|                                                                                                  | Symptoms suggestive of cardiac impairment | 1.50                                     |
|                                                                                                  | Involuntary muscle contractions           | 1.50                                     |
|                                                                                                  | Tingling                                  | 1.50                                     |
|                                                                                                  | Sexual dysfunction                        | 1.50                                     |
|                                                                                                  | Sensory loss, hyperesthesia or allodynia  | 1.50                                     |
|                                                                                                  | Vision impairment                         | 1.25                                     |
|                                                                                                  | Urinary dysfunctions                      | 1.25                                     |
|                                                                                                  | Hearing impairment                        | 1.00                                     |
|                                                                                                  | Cognitive impairment                      | 1.00                                     |
|                                                                                                  | Mental health issues                      | 0.75                                     |
|                                                                                                  | Behavioural impairment                    | 0.75                                     |
|                                                                                                  | Sleep disturbance                         | 0.75                                     |
|                                                                                                  | Chewing and Swallowing difficulties       | 0.50                                     |
|                                                                                                  | Headache                                  | 0.50                                     |
|                                                                                                  | Dizziness                                 | 0.50                                     |
|                                                                                                  | Breathing difficulties                    | 0.25                                     |
|                                                                                                  | Speech problems                           | 0.25                                     |
| Other                                                                                            | Muscular Fatigue                          | 2.03                                     |
|                                                                                                  | Muscle Weakness                           | 1.87                                     |
|                                                                                                  | Impaired physical function/activity       | 1.86                                     |

**SUPPLEMENTARY TABLE 1: Weighted severity scores of symptoms investigated by the EURO-PRO Questionnaire within each neuromuscular disease group**

| <b>Disease</b>                                                                      | <b>Symptom</b>                            | <b>Weighted symptoms severity scores</b> |
|-------------------------------------------------------------------------------------|-------------------------------------------|------------------------------------------|
|                                                                                     | Coordination and/or balance problems      | 1.70                                     |
|                                                                                     | Muscle Stiffness                          | 1.61                                     |
|                                                                                     | Mental Fatigue                            | 1.48                                     |
|                                                                                     | Muscle Pain                               | 1.48                                     |
|                                                                                     | Joint pain and/or swollen joints          | 1.18                                     |
|                                                                                     | Neuropathic pain                          | 1.17                                     |
|                                                                                     | Sleep disturbance                         | 1.17                                     |
|                                                                                     | Involuntary muscle contractions           | 1.14                                     |
|                                                                                     | Gastrointestinal dysfunction              | 1.10                                     |
|                                                                                     | Sexual dysfunction                        | 1.06                                     |
|                                                                                     | Mental health issues                      | 1.01                                     |
|                                                                                     | Tingling                                  | 0.98                                     |
|                                                                                     | Urinary dysfunctions                      | 0.91                                     |
|                                                                                     | Chewing and Swallowing difficulties       | 0.85                                     |
|                                                                                     | Cognitive impairment                      | 0.82                                     |
|                                                                                     | Sensory loss, hyperesthesia or allodynia  | 0.82                                     |
|                                                                                     | Autonomic symptoms                        | 0.77                                     |
|                                                                                     | Vision impairment                         | 0.75                                     |
|                                                                                     | Headache                                  | 0.72                                     |
|                                                                                     | Dizziness                                 | 0.68                                     |
|                                                                                     | Symptoms suggestive of cardiac impairment | 0.65                                     |
|                                                                                     | Hearing impairment                        | 0.64                                     |
|                                                                                     | Behavioural impairment                    | 0.64                                     |
|                                                                                     | Breathing difficulties                    | 0.58                                     |
|                                                                                     | Speech problems                           | 0.51                                     |
| Other Muscular Dystrophies (excluding Duchenne, Becker, FSHD, myotonic dystrophies) | Impaired physical function/activity       | 2.37                                     |
|                                                                                     | Muscle Weakness                           | 2.26                                     |
|                                                                                     | Coordination and/or balance problems      | 2.12                                     |
|                                                                                     | Muscular Fatigue                          | 2.05                                     |
|                                                                                     | Joint pain and/or swollen joints          | 1.35                                     |
|                                                                                     | Muscle Stiffness                          | 1.34                                     |
|                                                                                     | Muscle Pain                               | 1.29                                     |
|                                                                                     | Mental Fatigue                            | 1.17                                     |
|                                                                                     | Breathing difficulties                    | 1.00                                     |
|                                                                                     | Sleep disturbance                         | 0.95                                     |
|                                                                                     | Gastrointestinal dysfunction              | 0.85                                     |
|                                                                                     | Involuntary muscle contractions           | 0.82                                     |
|                                                                                     | Sexual dysfunction                        | 0.82                                     |
|                                                                                     | Symptoms suggestive of cardiac impairment | 0.75                                     |
|                                                                                     | Mental health issues                      | 0.75                                     |
|                                                                                     | Chewing and Swallowing difficulties       | 0.71                                     |

**SUPPLEMENTARY TABLE 1: Weighted severity scores of symptoms investigated by the EURO-PRO Questionnaire within each neuromuscular disease group**

| <b>Disease</b>                  | <b>Symptom</b>                            | <b>Weighted symptoms severity scores</b> |
|---------------------------------|-------------------------------------------|------------------------------------------|
| Skeletal Muscle Channelopathies | Neuropathic pain                          | 0.69                                     |
|                                 | Vision impairment                         | 0.65                                     |
|                                 | Autonomic symptoms                        | 0.65                                     |
|                                 | Tingling                                  | 0.63                                     |
|                                 | Headache                                  | 0.58                                     |
|                                 | Urinary dysfunctions                      | 0.58                                     |
|                                 | Hearing impairment                        | 0.40                                     |
|                                 | Behavioural impairment                    | 0.40                                     |
|                                 | Dizziness                                 | 0.37                                     |
|                                 | Cognitive impairment                      | 0.35                                     |
|                                 | Sensory loss, hyperesthesia or allodynia  | 0.35                                     |
|                                 | Speech problems                           | 0.32                                     |
|                                 | Muscular Fatigue                          | 3.00                                     |
|                                 | Mental Fatigue                            | 3.00                                     |
|                                 | Impaired physical function/activity       | 3.00                                     |
|                                 | Hearing impairment                        | 3.00                                     |
|                                 | Cognitive impairment                      | 3.00                                     |
|                                 | Mental health issues                      | 3.00                                     |
|                                 | Sleep disturbance                         | 3.00                                     |
|                                 | Autonomic symptoms                        | 3.00                                     |
|                                 | Muscle Weakness                           | 2.00                                     |
|                                 | Muscle Stiffness                          | 2.00                                     |
|                                 | Coordination and/or balance problems      | 2.00                                     |
|                                 | Muscle Pain                               | 2.00                                     |
|                                 | Joint pain and/or swollen joints          | 2.00                                     |
|                                 | Tingling                                  | 2.00                                     |
|                                 | Gastrointestinal dysfunction              | 2.00                                     |
|                                 | Urinary dysfunctions                      | 2.00                                     |
|                                 | Sensory loss, hyperesthesia or allodynia  | 2.00                                     |
|                                 | Involuntary muscle contractions           | 1.00                                     |
|                                 | Chewing and Swallowing difficulties       | 1.00                                     |
|                                 | Dizziness                                 | 1.00                                     |
|                                 | Sexual dysfunction                        | 1.00                                     |
|                                 | Symptoms suggestive of cardiac impairment | 0.00                                     |
|                                 | Neuropathic pain                          | 0.00                                     |
|                                 | Vision impairment                         | 0.00                                     |
|                                 | Breathing difficulties                    | 0.00                                     |
|                                 | Speech problems                           | 0.00                                     |
|                                 | Headache                                  | 0.00                                     |
|                                 | Behavioural impairment                    | 0.00                                     |
| Small Fibre Neuropathies        | Neuropathic pain                          | 2.61                                     |

**SUPPLEMENTARY TABLE 1: Weighted severity scores of symptoms investigated by the EURO-PRO Questionnaire within each neuromuscular disease group**

| <b>Disease</b>                | <b>Symptom</b>                            | <b>Weighted symptoms severity scores</b> |
|-------------------------------|-------------------------------------------|------------------------------------------|
| Spinal Muscular Atrophy (SMA) | Muscular Fatigue                          | 2.33                                     |
|                               | Sensory loss, hyperesthesia or allodynia  | 2.17                                     |
|                               | Gastrointestinal dysfunction              | 2.11                                     |
|                               | Tingling                                  | 2.06                                     |
|                               | Autonomic symptoms                        | 2.06                                     |
|                               | Mental Fatigue                            | 1.89                                     |
|                               | Sleep disturbance                         | 1.89                                     |
|                               | Coordination and/or balance problems      | 1.83                                     |
|                               | Cognitive impairment                      | 1.83                                     |
|                               | Impaired physical function/activity       | 1.78                                     |
|                               | Muscle Stiffness                          | 1.72                                     |
|                               | Joint pain and/or swollen joints          | 1.61                                     |
|                               | Vision impairment                         | 1.56                                     |
|                               | Urinary dysfunctions                      | 1.56                                     |
|                               | Muscle Pain                               | 1.50                                     |
|                               | Muscle Weakness                           | 1.44                                     |
|                               | Involuntary muscle contractions           | 1.39                                     |
|                               | Symptoms suggestive of cardiac impairment | 1.28                                     |
|                               | Dizziness                                 | 1.22                                     |
|                               | Sexual dysfunction                        | 1.22                                     |
|                               | Behavioural impairment                    | 1.17                                     |
|                               | Mental health issues                      | 1.11                                     |
|                               | Headache                                  | 1.06                                     |
|                               | Hearing impairment                        | 0.78                                     |
|                               | Chewing and Swallowing difficulties       | 0.72                                     |
|                               | Speech problems                           | 0.72                                     |
|                               | Breathing difficulties                    | 0.39                                     |
|                               | Impaired physical function/activity       | 2.46                                     |
|                               | Muscle Weakness                           | 2.23                                     |
|                               | Muscular Fatigue                          | 1.83                                     |
|                               | Coordination and/or balance problems      | 1.77                                     |
|                               | Breathing difficulties                    | 1.31                                     |
|                               | Muscle Stiffness                          | 1.07                                     |
|                               | Joint pain and/or swollen joints          | 1.01                                     |
|                               | Mental Fatigue                            | 1.00                                     |
|                               | Chewing and Swallowing difficulties       | 1.00                                     |
|                               | Sleep disturbance                         | 0.94                                     |
|                               | Involuntary muscle contractions           | 0.80                                     |
|                               | Muscle Pain                               | 0.73                                     |
|                               | Gastrointestinal dysfunction              | 0.73                                     |
|                               | Symptoms suggestive of cardiac impairment | 0.63                                     |

**SUPPLEMENTARY TABLE 1: Weighted severity scores of symptoms investigated by the EURO-PRO Questionnaire within each neuromuscular disease group**

| <b>Disease</b> | <b>Symptom</b>                           | <b>Weighted<br/>symptoms<br/>severity scores</b> |
|----------------|------------------------------------------|--------------------------------------------------|
|                | Autonomic symptoms                       | 0.61                                             |
|                | Mental health issues                     | 0.59                                             |
|                | Headache                                 | 0.50                                             |
|                | Neuropathic pain                         | 0.46                                             |
|                | Tingling                                 | 0.41                                             |
|                | Speech problems                          | 0.39                                             |
|                | Sensory loss, hyperesthesia or allodynia | 0.33                                             |
|                | Cognitive impairment                     | 0.31                                             |
|                | Vision impairment                        | 0.30                                             |
|                | Dizziness                                | 0.24                                             |
|                | Sexual dysfunction                       | 0.24                                             |
|                | Urinary dysfunctions                     | 0.23                                             |
|                | Behavioural impairment                   | 0.19                                             |
|                | Hearing impairment                       | 0.13                                             |
